# Supplementary material for: Strategies for the treatment of Hepatitis C in an era of interferon-free therapies: what public health outcomes do we value most?
Source: HighWire-hosted journal article supplement (doi:10.1136/gutjnl-2014-308166), 2014-11-06
Supplement: gutjnl-2014-308166supp.pdf [file gutjnl-2014-308166supp.pdf]

**Online Supplementary Material 5**

**Summary of median quantile regression model fitted to the Need for Recovery (NFR) score with fixed effects for site, including the adjusted coefficient estimate (Adj. Coef. Est.) with corresponding 95% confidence interval (CI) and p-value.**

|                                                                                       | <b>Adj. Coeff. Est. (95% CI)</b> | <b>P-value<sup>1</sup></b> |
|---------------------------------------------------------------------------------------|----------------------------------|----------------------------|
| Constant (baseline NFR score)                                                         | 59.51 (55.53 to 63.49)           | < 0.001                    |
| <b>Gender (baseline = Male)</b>                                                       |                                  |                            |
| • Female                                                                              | 3.38 (1.80 to 4.95)              | < 0.001                    |
| • Other/Prefer not to say                                                             | -0.10 (-7.84 to 7.64)            | 0.979                      |
| <b>Any long-term health conditions or disabilities (baseline = No)</b>                |                                  |                            |
| • Yes                                                                                 | 8.33 (5.73 to 10.93)             | < 0.001                    |
| • Prefer not to say                                                                   | 6.10 (1.78 to 10.43)             | 0.006                      |
| <b>ED paediatrics only? (baseline = No)</b>                                           |                                  |                            |
| • Yes                                                                                 | -8.47 (-12.97 to -3.98)          | < 0.001                    |
| <b>Clinical grade (baseline = Foundation)</b>                                         |                                  |                            |
| • ST1-ST2                                                                             | -0.20 (-2.55 to 2.16)            | 0.869                      |
| • > ST2                                                                               | 1.04 (-1.49 to 3.57)             | 0.421                      |
| • SASG                                                                                | -1.20 (-4.32 to 1.92)            | 0.450                      |
| • GP                                                                                  | -7.33 (-15.49 to 0.83)           | 0.078                      |
| • Consultant                                                                          | -4.94 (-7.72 to -2.17)           | < 0.001                    |
| <b>I have been able to request and take study when I wanted (baseline = Neutral)</b>  |                                  |                            |
| • Strongly disagree                                                                   | 3.45 (-0.19 to 7.10)             | 0.063                      |
| • Disagree                                                                            | 3.57 (0.53 to 6.61)              | 0.022                      |
| • Agree                                                                               | -1.18 (-3.36 to 1.00)            | 0.290                      |
| • Strongly agree                                                                      | -6.32 (-9.23 to -3.41)           | < 0.001                    |
| <b>I have been able to request and take annual when I wanted (baseline = Neutral)</b> |                                  |                            |
| • Strongly disagree                                                                   | 6.42 (2.69 to 10.15)             | 0.001                      |
| • Disagree                                                                            | 1.37 (-1.73 to 4.47)             | 0.385                      |
| • Agree                                                                               | -2.60 (-5.07 to -0.13)           | 0.039                      |
| • Strongly agree                                                                      | -4.31 (-7.33 to -1.28)           | 0.005                      |
| <b>Proportion of time spent working out of hours (baseline = 0-25%)</b>               |                                  |                            |
| • 26-50%                                                                              | 5.96 (3.16 to 8.76)              | < 0.001                    |
| • 51-75%                                                                              | 10.39 (7.54 to 13.25)            | < 0.001                    |
| • 76-100%                                                                             | 14.34 (10.92 to 17.75)           | < 0.001                    |
